# Supplementary material for: Alternatives to common approaches for training change of direction performance: a scoping review
Source: PubMed Central journal article supplement (PMC9347107; doi:10.1186/s13102-022-00544-9), 2022-08-03
Supplement: 13102_2022_544_MOESM1_ESM.pdf [file 13102_2022_544_MOESM1_ESM.pdf]

## Appendix 1. Search strategies

### Database: PubMed (MEDLINE)

| Set # | Search terms                                                                                                                                 | Results |
|-------|----------------------------------------------------------------------------------------------------------------------------------------------|---------|
| 1     | (change of direction[ti] OR cutting[ti] OR agility[ti] OR reactive agility[tiab])                                                            | 9,604   |
| 2     | (biomech*[ti] OR kinematics[tiab] OR determinants[tiab] OR strength[ti] OR "rate of force development"[tiab] OR "resistance training"[tiab]) | 263,400 |
| 3     | #1 AND #2                                                                                                                                    | 373     |
| 4     | #3 Filters: Journal Article, English                                                                                                         | 323     |

### Database: Scopus

| Set # | Search terms                                                            | Results |
|-------|-------------------------------------------------------------------------|---------|
| 1     | (TITLE-ABS-KEY("change of direction" OR agility OR "reactive agility")) | 19,277  |
| 2     | (TITLE(biomech* OR kinematics OR strength))                             | 275,558 |
| 3     | #1 AND #2                                                               | 338     |
| 4     | #3 AND (LIMIT-TO( LANGUAGE , "English"))                                | 325     |

### Database: SPORTDiscus

| Set # | Search terms                                                                                                                       | Results |
|-------|------------------------------------------------------------------------------------------------------------------------------------|---------|
| 1     | TI "change of direction" OR AB "change of direction" OR TI agility OR AB agility OR TI "reactive agility" OR AB "reactive agility" | 4,169   |
| 2     | TI kinematics OR TI determinants OR TI strength OR TI "rate of force development" OR TI "resistance training"                      | 32,263  |
| 3     | #1 AND #2                                                                                                                          | 327     |
| 4     | #3 Narrow by language: English                                                                                                     | 297     |

**Database: Web of Science:**

| <b>Set #</b> | <b>Search terms</b>                                                                                                      | <b>Results</b> |
|--------------|--------------------------------------------------------------------------------------------------------------------------|----------------|
| 1            | TITLE: ("change of direction") OR TITLE: (agility) OR TITLE: ("reactive agility")                                        | 2,773          |
| 2            | TITLE: (biomech*) OR TITLE: (kinematics) OR TITLE: (determinants) OR TITLE: (strength) OR TITLE: ("resistance training") | 338,232        |
| 3            | #1 AND #2                                                                                                                | 148            |
| 4            | #2 AND #1 Refined by: LANGUAGES: ( ENGLISH )                                                                             | 139            |
